# Supplementary figures and images for: Uptake of Tropheryma whipplei by Intestinal Epithelia
Source: MDPI journal article supplement (doi:10.3390/ijms24076197), 2023-03-24

# Monolayer

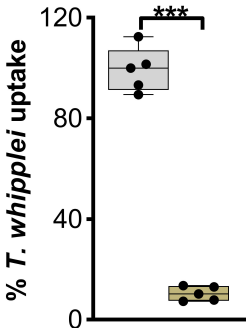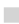

*T. whipplei*

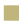

Heat inactivated

Supplement: s1 [file s1]

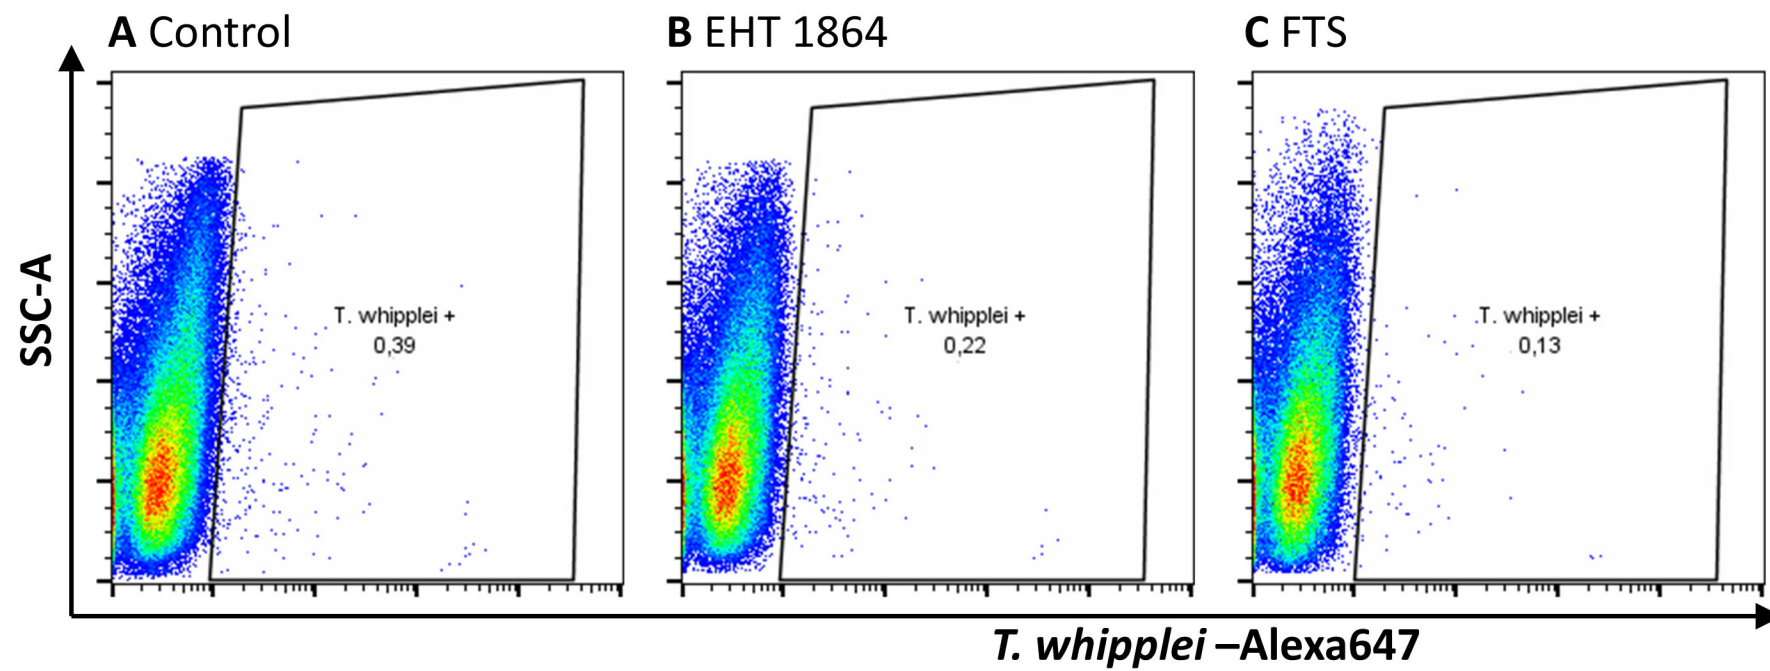

Supplement: s1 [file s1]

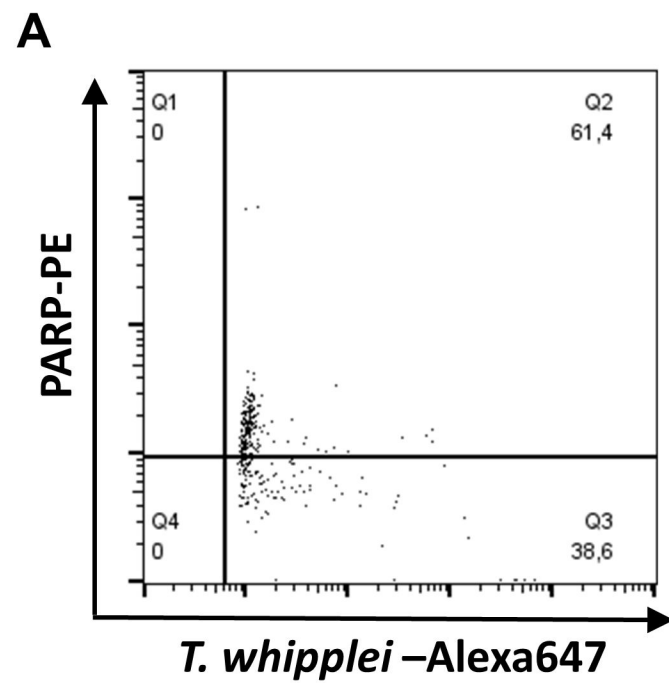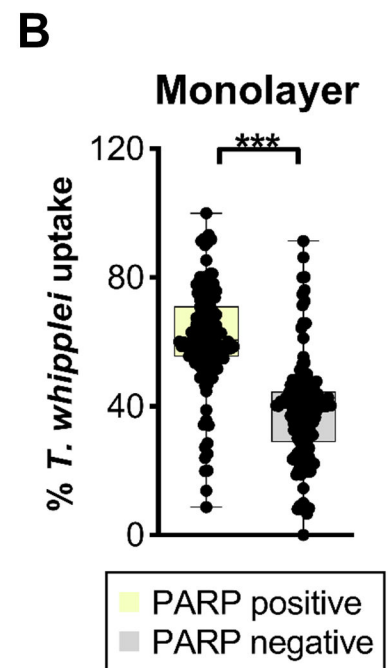

Supplement: s1 [file s1]

# Monolayer

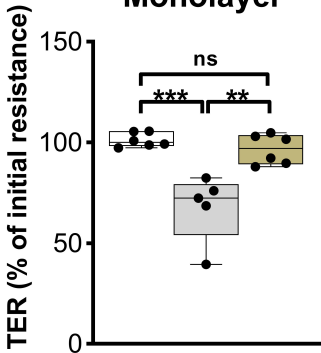

- control
- *T. whipplei*
- Heat inactivated

Supplement: s1 [file s1]

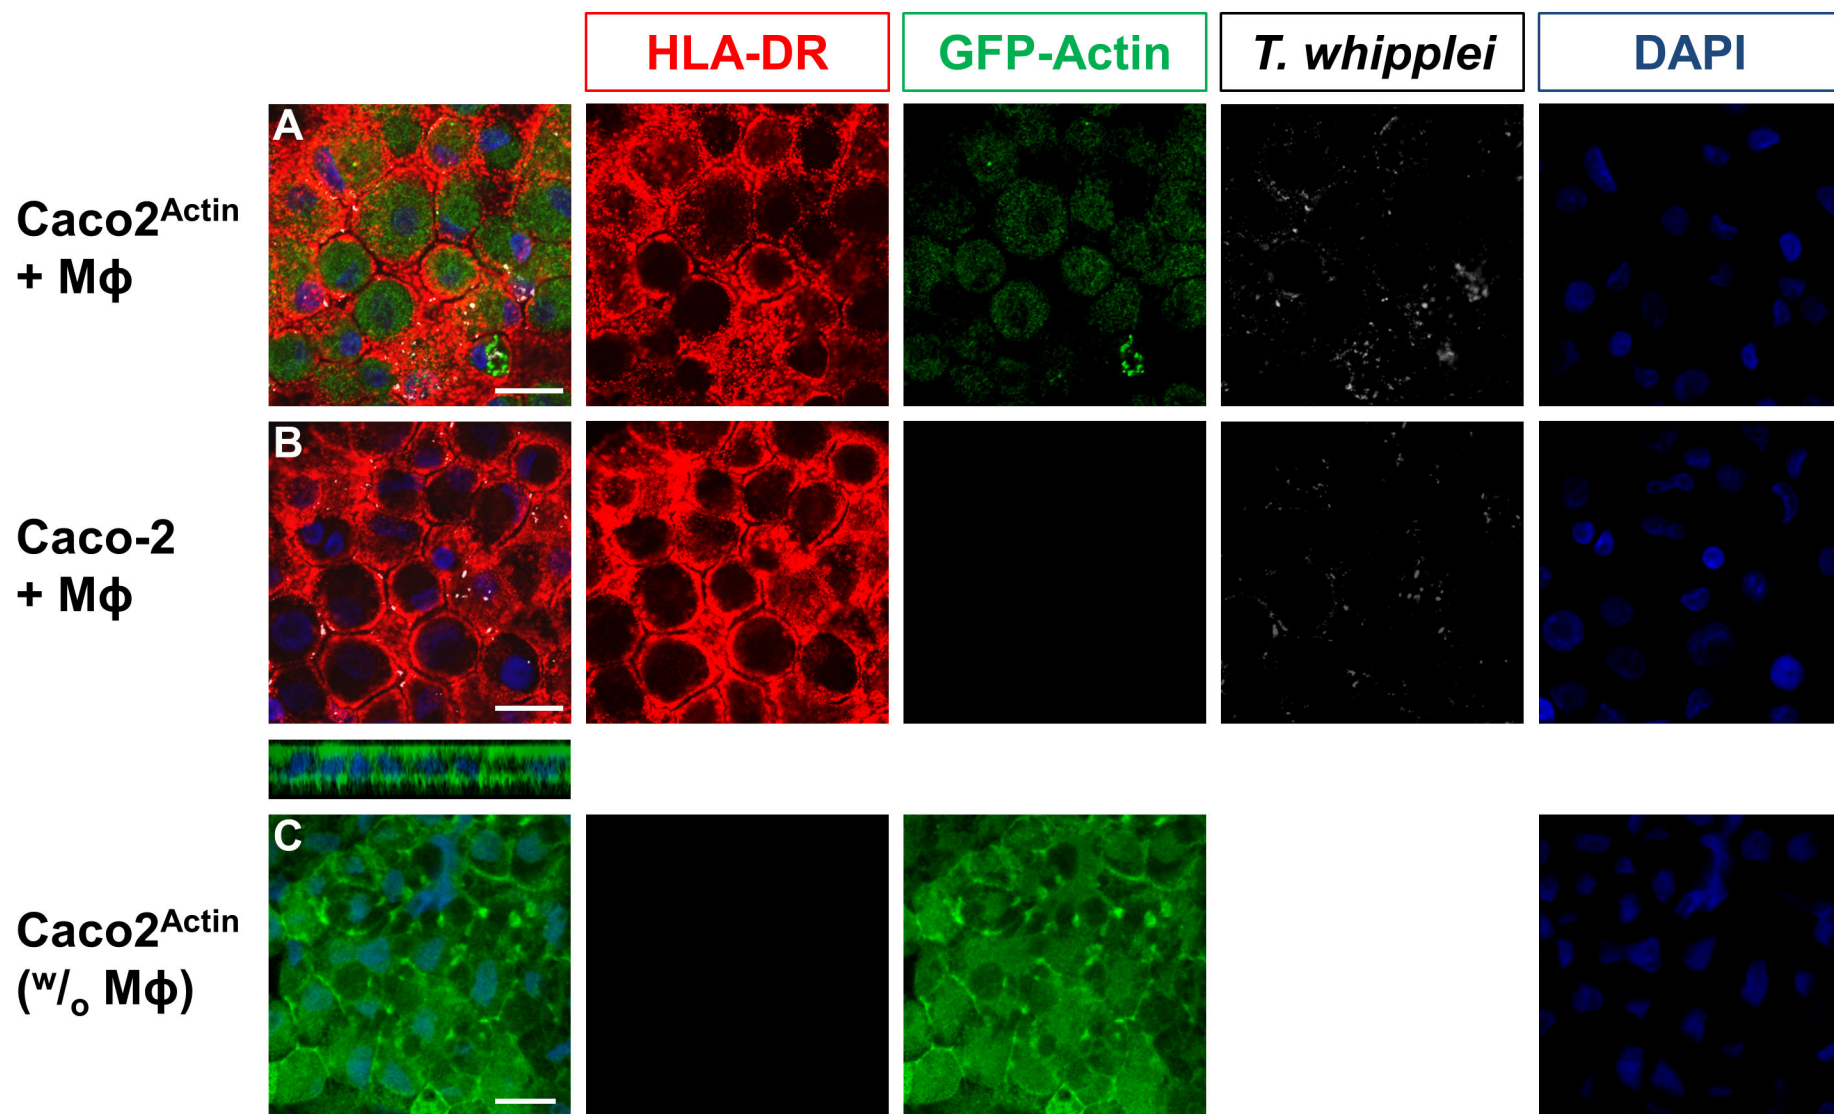

Supplement: s1 [file s1]

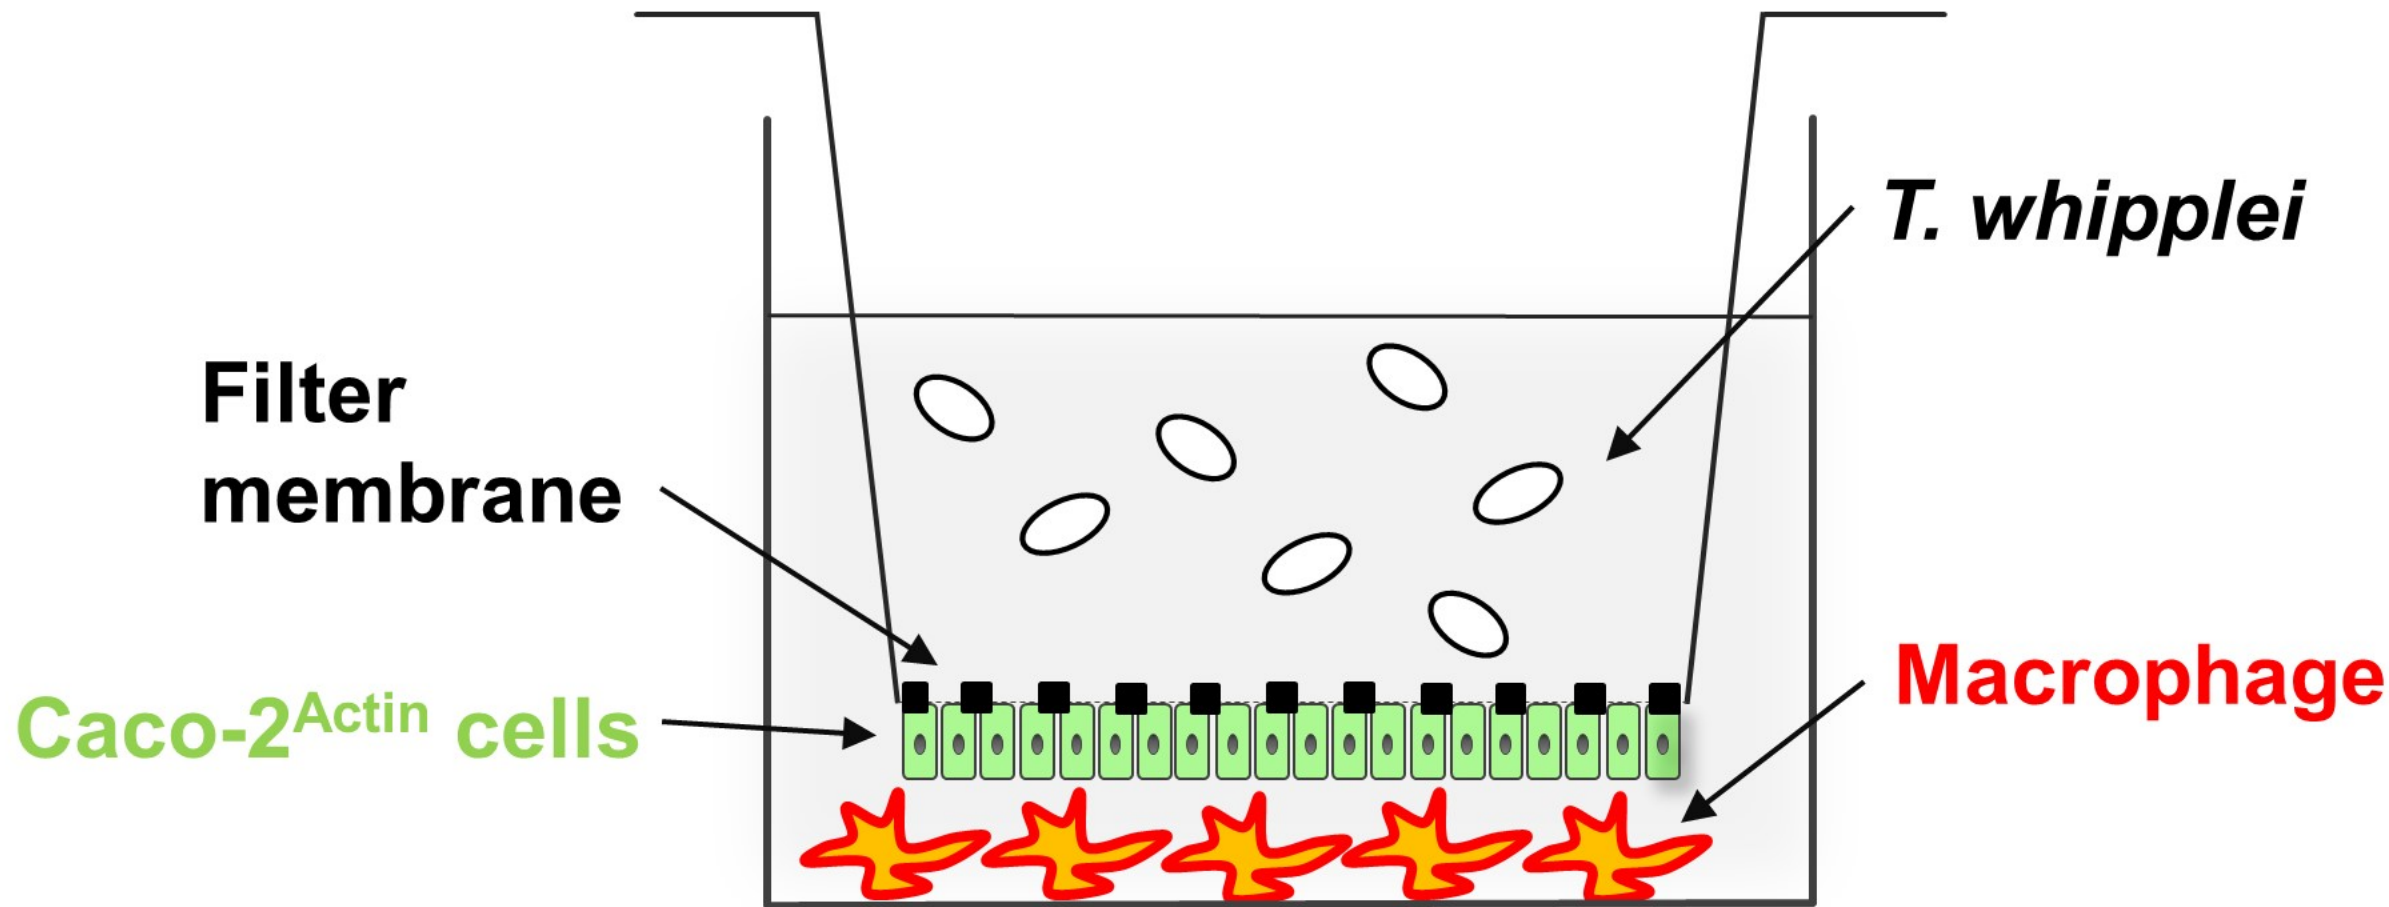

Supplement: s1 [file s1]

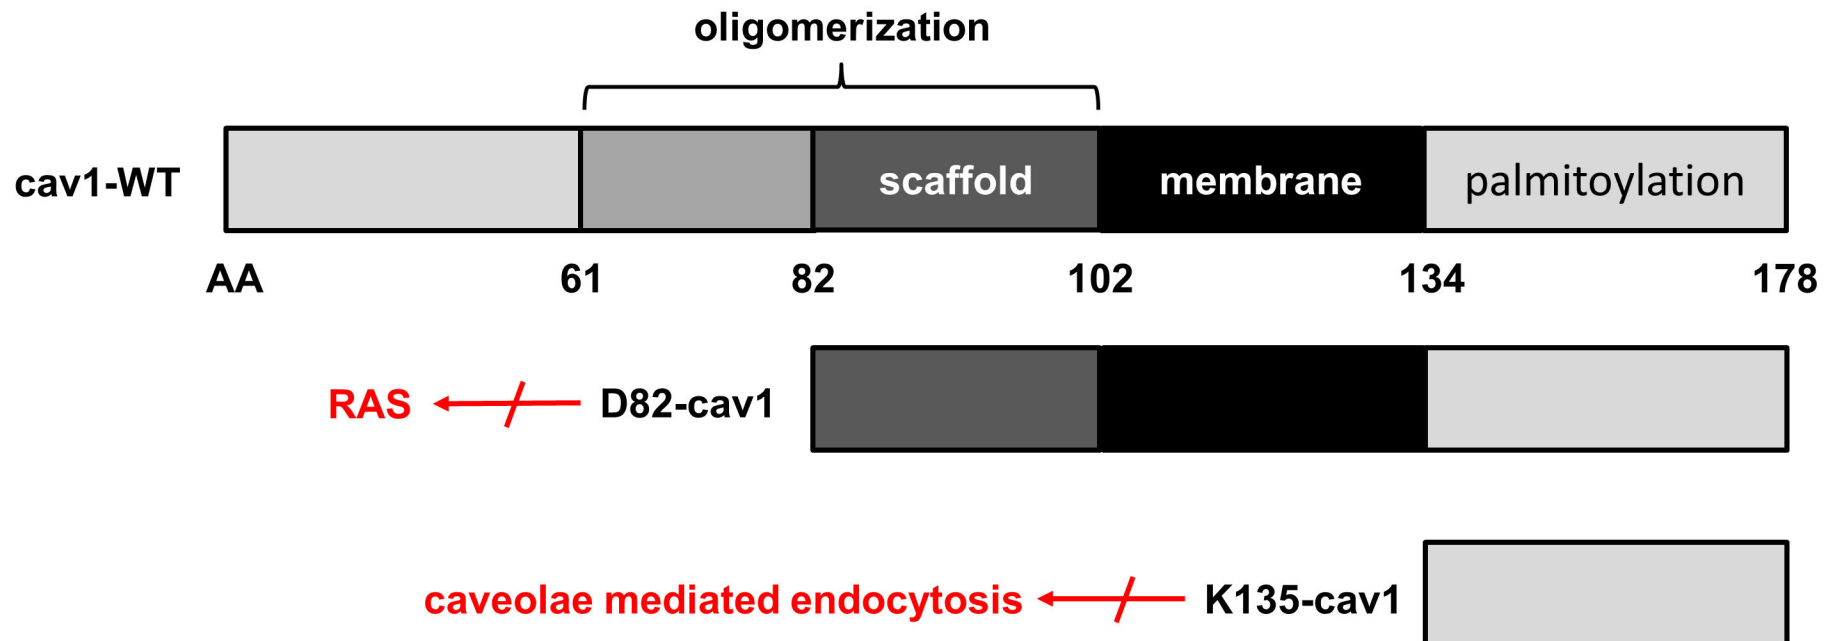

Supplement: s1 [file s1]

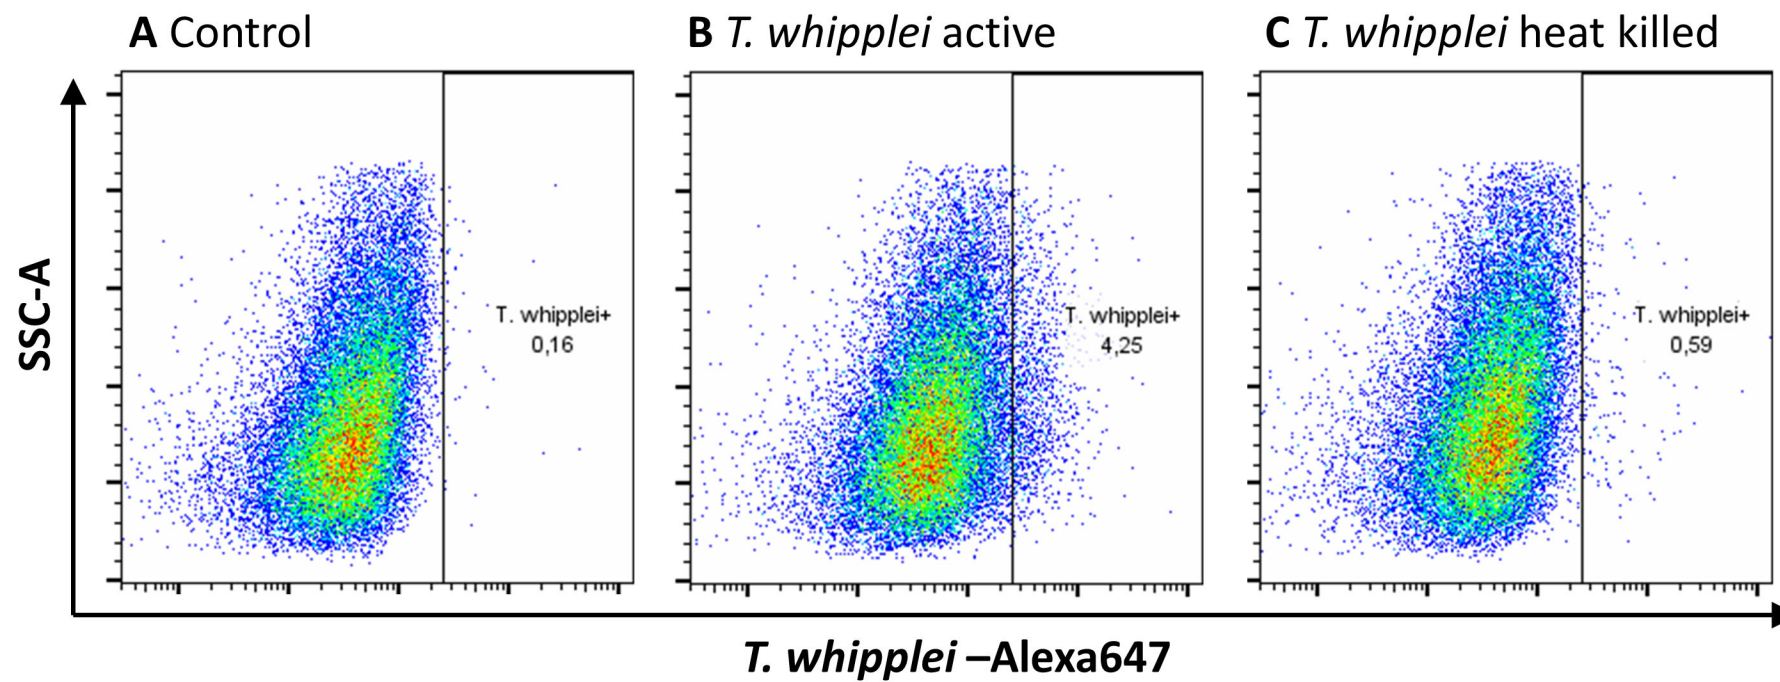

Supplement: s1 [file s1]

**A** Isotype Control

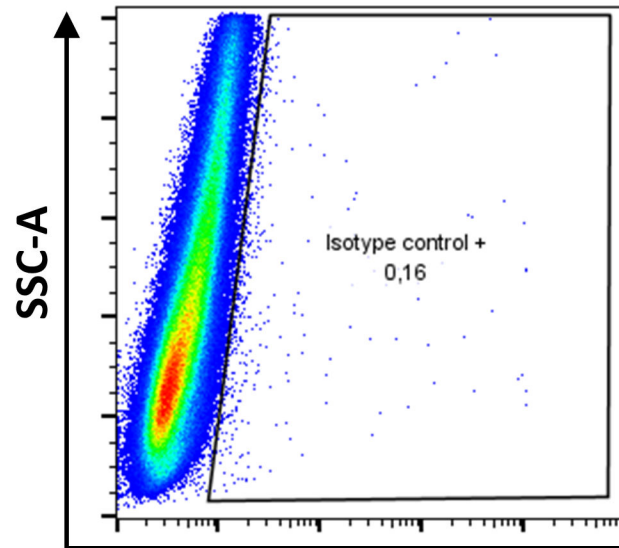

**B** Rabbit anti *T. whipplei*

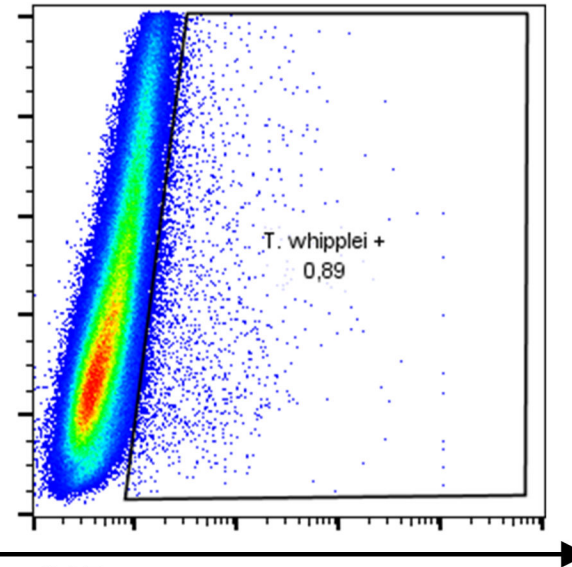

Alexa647

Supplement: s1 [file s1]

# Monolayer



*T. whipplei*



Heat inactivated

Supplement: s1 [file s1]

**no *T.whipplei***

***T.whipplei* exposed**

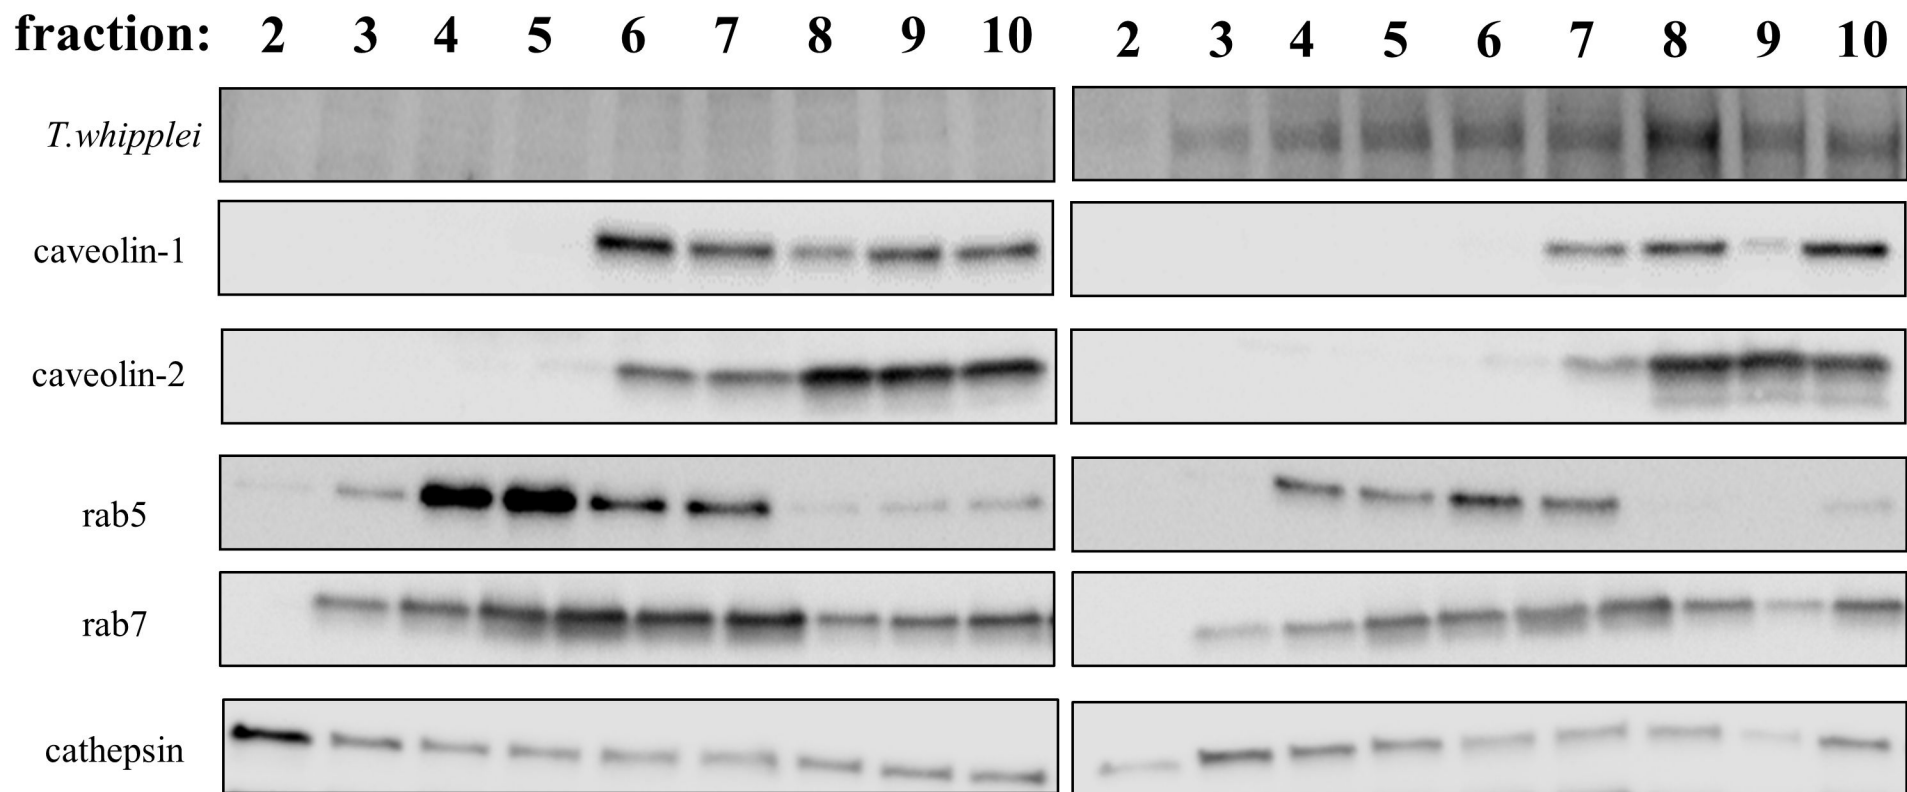

Supplement: s1 [file s1]

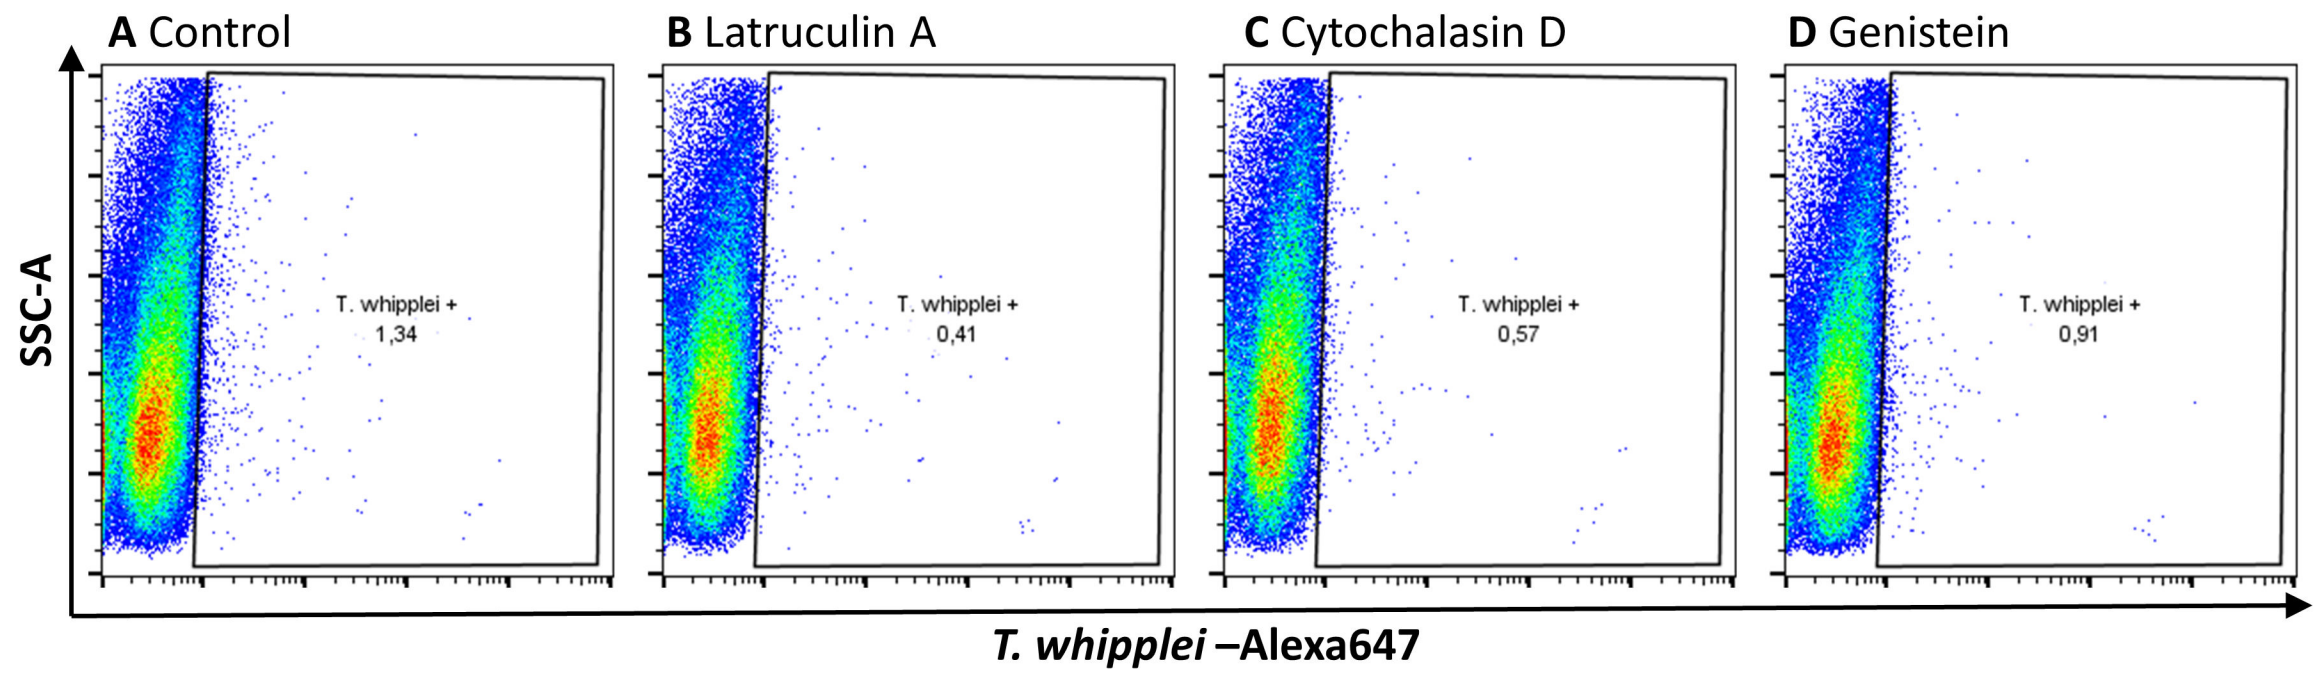

Supplement: s1 [file s1]

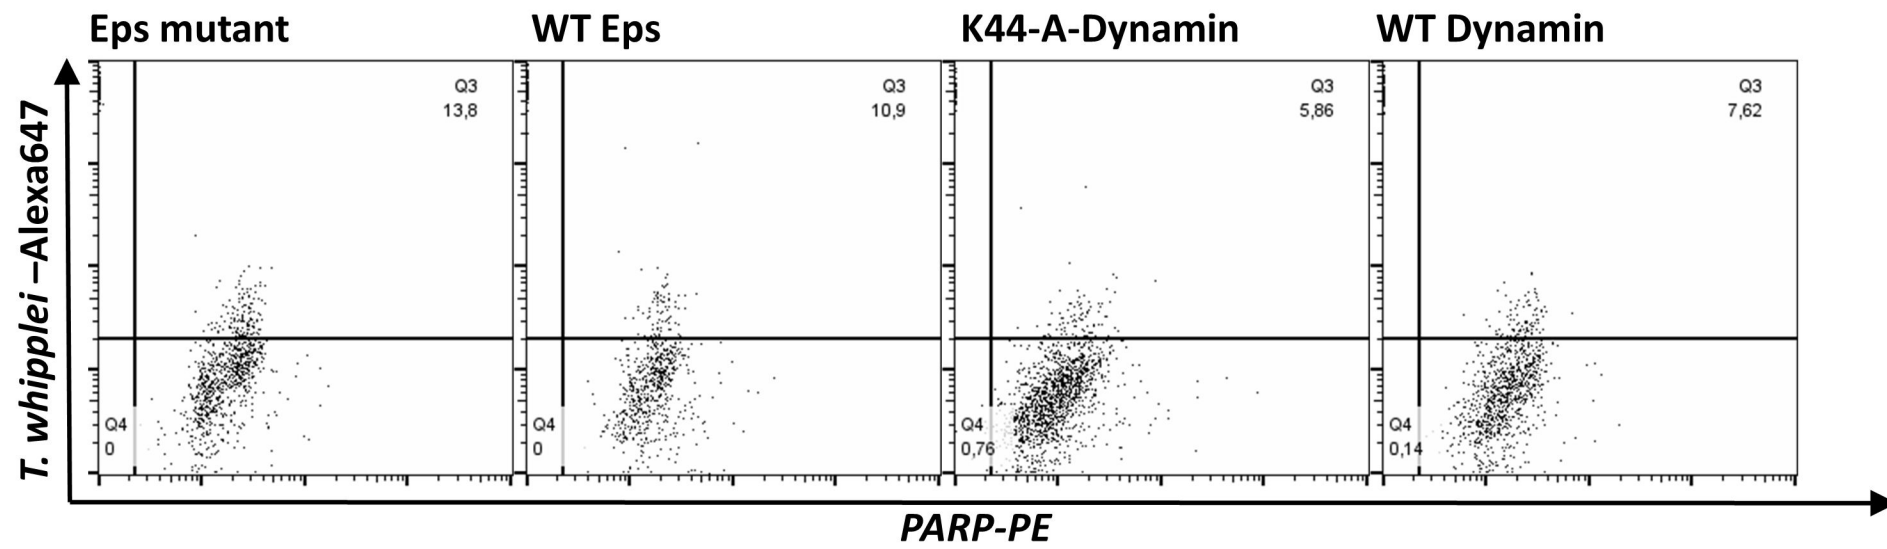

Supplement: s1 [file s1]

***T. whipplei*:**      no    yes   yes   no   yes   yes   no   yes   yes

caveolin-1

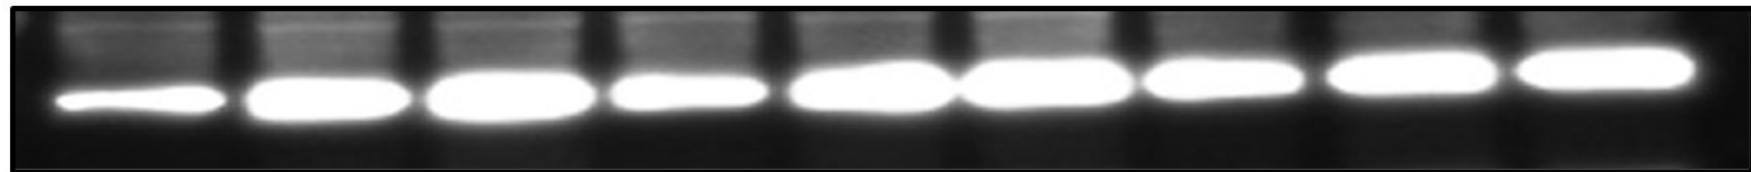

caveolin-2

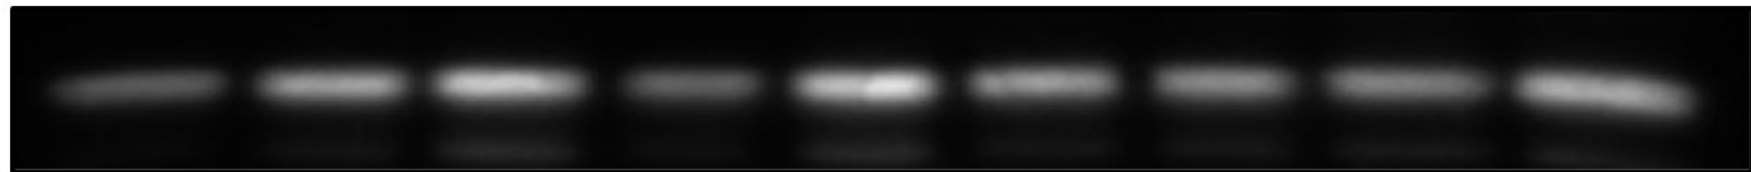

actin

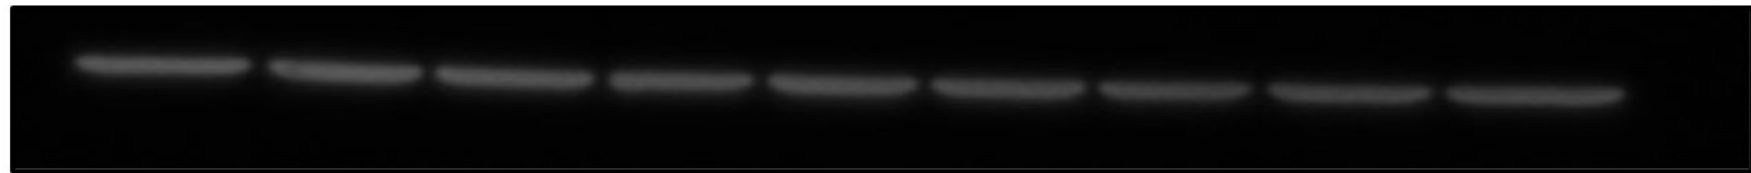

Supplement: s1 [file s1]
